# Supplementary material for: A Marine Isolate of Bacillus pumilus Secretes a Pumilacidin Active against Staphylococcus aureus
Source: PubMed Central journal article supplement (PMC6025400; doi:10.3390/md16060180), 2018-05-24
Supplement: marinedrugs-16-00180-s001.pdf [file marinedrugs-16-00180-s001.pdf]

**Table S1.** Marine isolated strains of the *Bacillus* genus.

| <b>Strain ID</b> | <b>Species</b>              | <b>Reference</b>      |
|------------------|-----------------------------|-----------------------|
| SF200A           | <i>Bacillus altitudinis</i> | [17]                  |
| SF203            | <i>Bacillus firmus</i>      | Laboratory collection |
| SF204            | <i>Bacillus aquimaris</i>   | [17]                  |
| SF206            | <i>Bacillus pumilus</i>     | Laboratory collection |
| SF208            | <i>Bacillus altitudinis</i> | [17]                  |
| SF213            | <i>Bacillus firmus</i>      | Laboratory collection |
| SF214            | <i>Bacillus pumilus</i>     | [17]                  |
| SF216            | <i>Bacillus pumilus</i>     | Laboratory collection |
| SF217            | <i>Bacillus firmus</i>      | Laboratory collection |
| SF221            | <i>Bacillus altitudinis</i> | [17]                  |
| SF222            | <i>Bacillus marisflavi</i>  | [17]                  |
| SF223            | <i>Bacillus aquimaris</i>   | [17]                  |
| SF224            | <i>Bacillus pumilus</i>     | Laboratory collection |
| SF241            | <i>Bacillus firmus</i>      | [17]                  |
| SF242            | <i>Bacillus cibi</i>        | [17]                  |

**Table S2.** Antimicrobial plate assay with 20 ml of filter-sterilized supernatant of SF214.

| <b>Hosts</b>                                | <b>Supernatant activity<br/>of SF214<sup>a</sup></b> |
|---------------------------------------------|------------------------------------------------------|
| <i>Streptococcus faecalis</i> ATCC 33186    | 0                                                    |
| <i>Bacillus megaterium</i> QMB1551          | 0                                                    |
| <i>Staphylococcus aureus</i> ATCC 6538      | 10                                                   |
| <i>Listeria monocytogenes</i> ATCC 7644     | 10                                                   |
| <i>Mycobacterium smegmatis</i> MC-2 155     | 0                                                    |
| <i>Enterococcus faecalis</i> ATCC 29212     | 0                                                    |
| <i>Citrobacter freundii</i> ATCC 43864      | 0                                                    |
| <i>Pseudomonas fluorescens</i> ATCC 13525   | 0                                                    |
| <i>Shigella sonnei</i> ATCC 25931           | 0                                                    |
| <i>Escherichia coli</i> ATCC 25922          | 0                                                    |
| <i>Salmonella enterica typh.</i> ATCC 14028 | 0                                                    |

<sup>a</sup>Diameter (mm) of the inhibition halo in plate assays (Experimental section).

**Table S3.** GenBank accession numbers<sup>a</sup> of genome sequences and locus tags<sup>b</sup> of 16S and *gyrB* genes of the indicated bacterial strains.

|                                        | <b>Genome<sup>a</sup></b> | <b>16S<sup>b</sup></b> | <b><i>gyrB</i><sup>b</sup></b> |
|----------------------------------------|---------------------------|------------------------|--------------------------------|
| <i>Bacillus pumilus</i> SF214          | PRJNA290581               | SF214_6rRNA16S         | SF214_1687                     |
| <i>Bacillus subtilis</i> 6051-HGW      | NC_020507.1               | BSU6051_RS00040        | BSU6051_RS00030                |
| <i>Bacillus amyloliquefaciens</i> LL3  | NC_017190.1               | LL3_r0001              | LL3_00006                      |
| <i>Bacillus licheniformis</i> DSM 13   | NC_006322.1               | BLI_RS00040            | BLI_RS00030                    |
| <i>Bacillus pumilus</i> SH-B9          | NZ_CP011007.1             | UP12_RS00040           | UP12_RS00030                   |
| <i>Bacillus pumilus</i> SAFR-032       | NC_009848.4               | BPUM_RS00040           | BPUM_RS00030                   |
| <i>Bacillus pumilus</i> PDSLzg-1       | NZ_CP016784.1             | BEN31_RS02295          | BEN31_RS15745                  |
| <i>Bacillus safensis</i> U41           | NZ_CP015610.1             | BSA41_RS00985          | BSA41_RS17530                  |
| <i>Bacillus safensis</i> U17-1         | NZ_CP015611.1             | BSA171_RS00005         | BSA171_RS00540                 |
| <i>Bacillus safensis</i> KCTC          | NZ_CP018197.1             | BSL056_RS00040         | BSL056_RS00030                 |
| <i>Bacillus cereus</i> ATCC10987       | NC_003909.8               | BCE_RS00035            | BCE_RS00025                    |
| <i>Bacillus licheniformis</i> ATCC9789 | NZ_CP023729.1             | CPQ91_RS00040          | CPQ91_RS00030                  |
| <i>Bacillus safensis</i> BRM1          | NZ_CP018100.1             | BRL64_RS00040          | BRL64_RS00030                  |
